# Supplementary material for: Adherence to a healthy lifestyle counteracts the negative effects of risk factors on all-cause mortality in the oldest-old
Source: publisher site journal article supplement (doi:10.18632/aging.102274), 2019-09-16
Supplement: Supplementary file [file aging-v11i18-102274-supplementary-material-SD1.pdf]

## SUPPLEMENTARY TABLES

**Supplementary Table 1. The adverse effect of unhealthy lifestyles on risk of mortality among oldest-old.**

| <b>Lifestyles</b>                            | <b>HR (95% CI)</b> | <b>P value</b> |
|----------------------------------------------|--------------------|----------------|
| <b>Smoking</b>                               |                    |                |
| Never                                        | 1 (Ref.)           |                |
| Former smoking                               | 1.14 (1.08–1.21)   | <0.001         |
| Current smoking                              | 1.07 (1.01–1.14)   | 0.027          |
| <b>Drinking</b>                              |                    |                |
| Never                                        | 1 (Ref.)           |                |
| Former drinking                              | 1.11 (1.05–1.18)   | 0.001          |
| Current drinking                             | 1.01 (0.96–1.07)   | 0.619          |
| <b>Exercising</b>                            |                    |                |
| Current exercising                           | 1 (Ref.)           |                |
| Former exercising                            | 1.04 (0.96–1.12)   | 0.318          |
| Never exercising                             | 1.09 (1.04–1.14)   | 0.001          |
| <b>Diet</b>                                  |                    |                |
| Nonideal diet                                | 1.05 (1.01–1.09)   | 0.032          |
| <b>BMI</b>                                   |                    |                |
| Normal weight (18.5–24.9 kg/m <sup>2</sup> ) | 1 (Ref.)           |                |
| Underweight (<18.5 kg/m <sup>2</sup> )       | 1.14 (1.10–1.19)   | <0.001         |
| Overweight (≥ 25 kg/m <sup>2</sup> )         | 1.02 (0.93–1.12)   | 0.640          |

Model was adjusted for age, gender, residence, ethnic, education level, economic level, marital status, systolic BP, diastolic BP, heart rate, physical disability, cognitive function, comorbidity.

**Supplementary Table 2. The gender difference of association between BP and mortality in oldest-old.**

| <b>Blood pressure (BP)</b> | <b>Male</b>        |                | <b>Female</b>      |                | <b>P for interaction</b> |
|----------------------------|--------------------|----------------|--------------------|----------------|--------------------------|
|                            | <b>HR (95% CI)</b> | <b>P value</b> | <b>HR (95% CI)</b> | <b>P value</b> |                          |
| <b>Systolic BP (mmHg)</b>  |                    |                |                    |                |                          |
| <110 vs. 110–139           | 1.05 (0.92–1.20)   | 0.473          | 1.04 (0.95–1.14)   | 0.426          | 0.331                    |
| 140–159 vs. 110–139        | 1.05 (0.97–1.13)   | 0.206          | 0.96 (0.91–1.02)   | 0.225          |                          |
| ≥160 vs. 110–139           | 0.97 (0.87–1.07)   | 0.502          | 0.95 (0.88–1.03)   | 0.232          |                          |
| <b>Diastolic BP (mmHg)</b> |                    |                |                    |                |                          |
| <60 vs. 60–79              | 1.01 (0.91–1.11)   | 0.919          | 0.98 (0.91–1.06)   | 0.678          | 0.955                    |
| ≥80 vs. 60–79              | 0.98 (0.91–1.05)   | 0.574          | 1.01 (0.95–1.08)   | 0.650          |                          |

Model was adjusted for age, residence, ethnic, education level, economic level, marital status, heart rate, physical disability, cognitive function, comorbidity, smoking, diet, drinking, physical exercising, BMI, as well as systolic BP or diastolic BP.

**Supplementary Table 3. The association of the risk of mortality in relation to sociodemographic factors, cardiovascular profile, health status, and lifestyle among normal cognition, physical performance and free of comorbidity.**

| <b>Variables</b>                       | <b>Oldest-old without impaired cognition</b> | <b>Oldest-old without physical disability</b> | <b>Oldest-old without comorbidity</b> |
|----------------------------------------|----------------------------------------------|-----------------------------------------------|---------------------------------------|
| <b>Age</b>                             | 1.045 (1.041–1.049)                          | 1.056 (1.052–1.060)                           | 1.049 (1.046–1.053)                   |
| <b>Male vs. Female</b>                 | 1.21 (1.14–1.28)                             | 1.35 (1.27–1.43)                              | 1.25 (1.18–1.33)                      |
| <b>Non-Han vs. Han</b>                 | 1.16 (1.06–1.27)                             | 1.08 (0.99–1.17)                              | 1.17 (1.08–1.27)                      |
| <b>Not in marriage vs. In marriage</b> | 1.11 (1.03–1.19)                             | 1.25 (1.17–1.34)                              | 1.19 (1.11–1.27)                      |
| <b>Literate vs. illiterate</b>         | 0.97 (0.91–1.03)                             | 1.06 (0.99–1.12)                              | 1.02 (0.96–1.08)                      |
| <b>Rural vs. Urban</b>                 | 1.13 (1.08–1.19)                             | 1.13 (1.07–1.19)                              | 1.13 (1.08–1.19)                      |
| <b>Economic level</b>                  |                                              |                                               |                                       |
| Middle vs. Low                         | 1.26 (1.15–1.37)                             | 1.09 (0.99–1.20)                              | 1.18 (1.08–1.29)                      |
| High vs. Low                           | 1.35 (1.25–1.47)                             | 1.15 (1.05–1.25)                              | 1.23 (1.14–1.33)                      |
| <b>Systolic BP (mmHg)</b>              |                                              |                                               |                                       |
| <110 vs. 110–139                       | 1.08 (1.00–1.18)                             | 1.07 (0.98–1.18)                              | 1.03 (0.94–1.12)                      |
| 140–159 vs. 110–139                    | 0.99 (0.94–1.05)                             | 0.99 (0.93–1.05)                              | 0.99 (0.94–1.04)                      |
| ≥160 vs. 110–139                       | 0.99 (0.92–1.07)                             | 0.92 (0.85–1.00)                              | 0.95 (0.89–1.02)                      |
| <b>Diastolic BP (mmHg)</b>             |                                              |                                               |                                       |
| <60 vs. 60–79                          | 0.99 (0.93–1.06)                             | 0.98 (0.91–1.05)                              | 1.00 (0.94–1.07)                      |
| ≥80 vs. 60–79                          | 0.97 (0.93–1.03)                             | 1.00 (0.95–1.06)                              | 1.00 (0.95–1.06)                      |
| <b>Heart rate</b>                      |                                              |                                               |                                       |
| <60 vs. 60–79                          | 1.03 (0.92–1.15)                             | 1.04 (0.92–1.18)                              | 1.01 (0.90–1.13)                      |
| ≥80 vs. 60–79                          | 1.03 (0.98–1.09)                             | 1.01 (0.96–1.07)                              | 1.01 (0.96–1.07)                      |
| <b>Physical disability</b>             | 1.42 (1.35–1.49)                             | –                                             | 1.34 (1.27–1.41)                      |
| <b>Cognitive function</b>              |                                              |                                               |                                       |
| Mild vs. normal                        | –                                            | 1.19 (1.13–1.27)                              | 1.20 (1.13–1.27)                      |
| Moderate vs. normal                    | –                                            | 1.32 (1.23–1.42)                              | 1.31 (1.22–1.40)                      |
| Severe vs. normal                      | –                                            | 1.54 (1.43–1.67)                              | 1.53 (1.43–1.64)                      |
| <b>Comorbidity</b>                     | 1.09 (1.03–1.15)                             | 1.16 (1.09–1.23)                              | –                                     |
| <b>Never smoking</b>                   | 0.93 (0.88–0.98)                             | 0.89 (0.84–0.94)                              | 0.91 (0.86–0.96)                      |
| <b>Never drinking</b>                  | 0.95 (0.90–0.99)                             | 0.96 (0.90–1.00)                              | 0.95 (0.90–0.99)                      |
| <b>Exercising</b>                      | 0.92 (0.88–0.96)                             | 0.92 (0.87–0.96)                              | 0.95 (0.91–0.99)                      |
| <b>Ideal diet</b>                      | 0.95 (0.91–0.99)                             | 0.98 (0.93–1.04)                              | 0.94 (0.90–0.98)                      |
| <b>Normal weight</b>                   | 0.87 (0.83–0.91)                             | 0.89 (0.85–0.93)                              | 0.90 (0.96–0.94)                      |

**Supplementary Table 4. The joint effect of independent risk factors and healthy lifestyle scores on risk of mortality.**

| <b>Score profile</b> | <b>High protecting</b> | <b>Median protecting</b> | <b>Low protecting</b> |
|----------------------|------------------------|--------------------------|-----------------------|
| Low risk             | 1 (Ref.)               | 1.30 (1.19–1.42)         | 1.36 (1.23–1.51)      |
| Median risk          | 1.53 (1.42–1.65)       | 1.76 (1.61–1.91)         | 1.83 (1.69–2.01)      |
| High risk            | 2.56 (2.38–2.75)       | 2.82 (2.62–3.03)         | 2.97 (2.76–3.20)      |

**Supplementary Table 5. Development of composite risk and protecting score and hypothetical examples.**

|                                  | <b>Factors status</b>  | <b>Beta coefficient in Cox model<sup>a</sup> (<math>\beta_i</math>)</b> | <b>Constant Beta coefficient for one-year increase in age (<math>\beta_0</math>)</b> | <b>Risk points before rounding (<math>\beta_i/\beta_0</math>)</b> | <b>Integer risk points</b> |
|----------------------------------|------------------------|-------------------------------------------------------------------------|--------------------------------------------------------------------------------------|-------------------------------------------------------------------|----------------------------|
| <b>Hypothetical individual 1</b> |                        |                                                                         |                                                                                      |                                                                   |                            |
| Gender                           | Female                 | 0                                                                       | 0.044                                                                                | 0                                                                 | 0                          |
| Residence                        | Rural                  | 0.131                                                                   | 0.044                                                                                | 2.977                                                             | 3                          |
| Physical performance             | Normal                 | 0                                                                       | 0.044                                                                                | 0                                                                 | 0                          |
| Cognitive function               | MMSE = 23              | 0.293                                                                   | 0.044                                                                                | 6.649                                                             | 7                          |
| Smoking status                   | Never smoking          | -0.105                                                                  | 0.044                                                                                | -2.394                                                            | -2                         |
| BMI                              | 16.8 kg/m <sup>2</sup> | 0                                                                       | 0.044                                                                                | 0                                                                 | 0                          |
| <b>Hypothetical individual 2</b> |                        |                                                                         |                                                                                      |                                                                   |                            |
| Gender                           | Male                   | 0.231                                                                   | 0.044                                                                                | 5.251                                                             | 5                          |
| Residence                        | Urban                  | 0                                                                       | 0.044                                                                                | 0                                                                 | 0                          |
| Physical performance             | Disability             | 0.293                                                                   | 0.044                                                                                | 6.649                                                             | 7                          |
| Cognitive function               | MMSE = 28              | 0                                                                       | 0.044                                                                                | 0                                                                 | 0                          |
| Smoking status                   | Current smoking        | 0                                                                       | 0.044                                                                                | 0                                                                 | 0                          |
| BMI                              | 22.5 kg/m <sup>2</sup> | -0.128                                                                  | 0.044                                                                                | -2.904                                                            | -3                         |

<sup>a</sup>Model including age, gender, residence, ethnic, education level, economic situation, marital status, systolic BP, diastolic BP, heart rate, physical disability, cognitive function, comorbidity, smoking status, drinking, exercising, diet and BMI.
